# Supplementary material for: Syndromic MEN1 parathyroid adenomas consist of both subclonal nodules and clonally independent tumors
Source: PubMed Central journal article supplement (PMC11106174; doi:10.1007/s00428-023-03730-3), 2024-01-20

**A**

**N1**

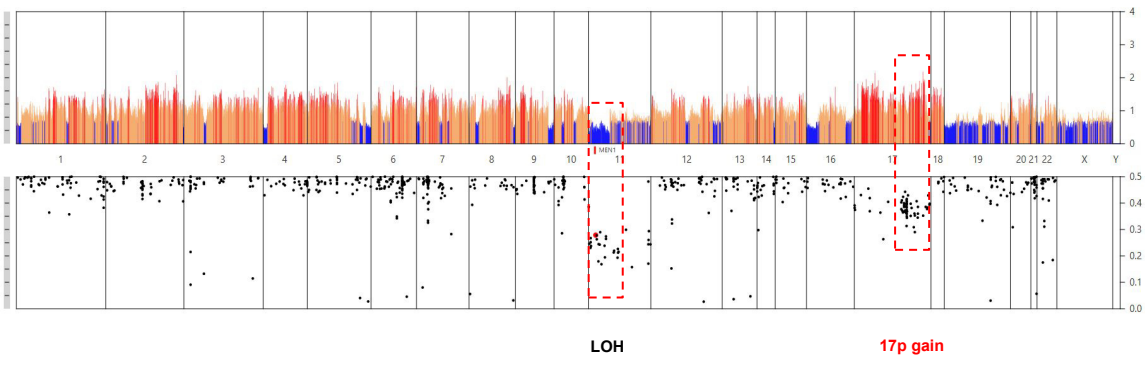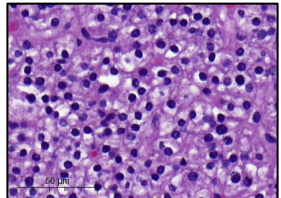

**N2**

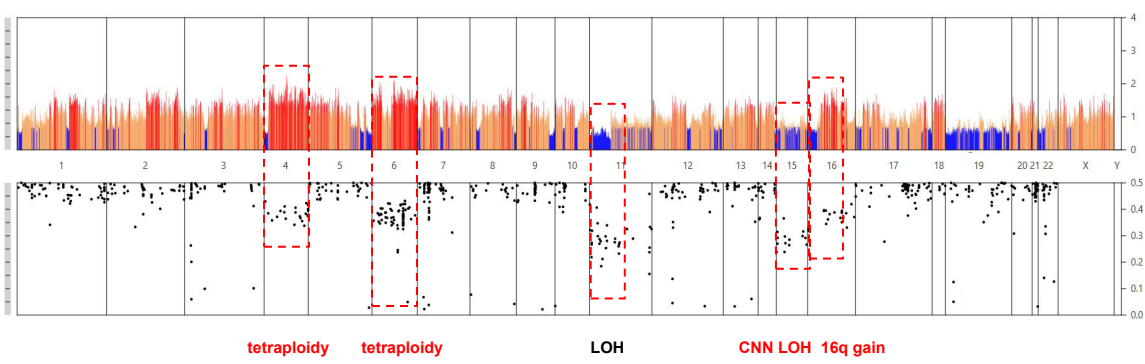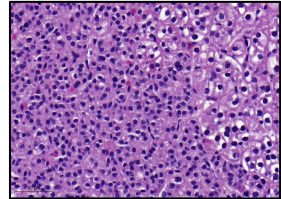

**N3**

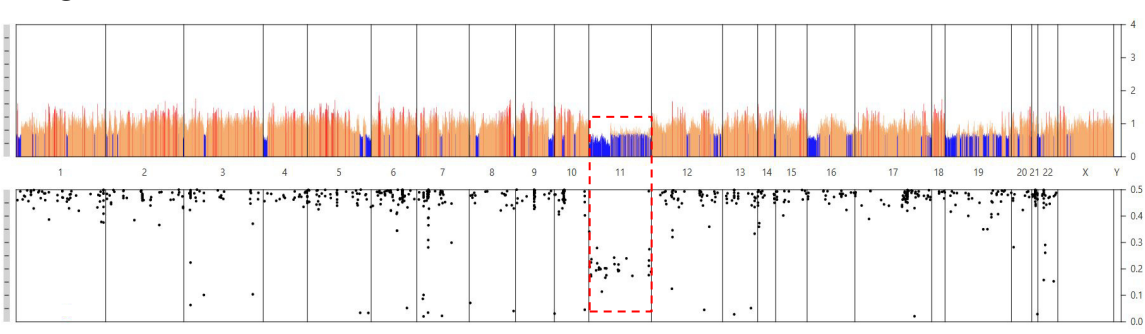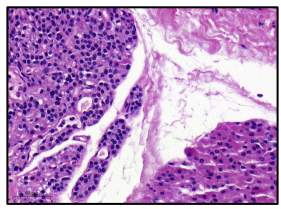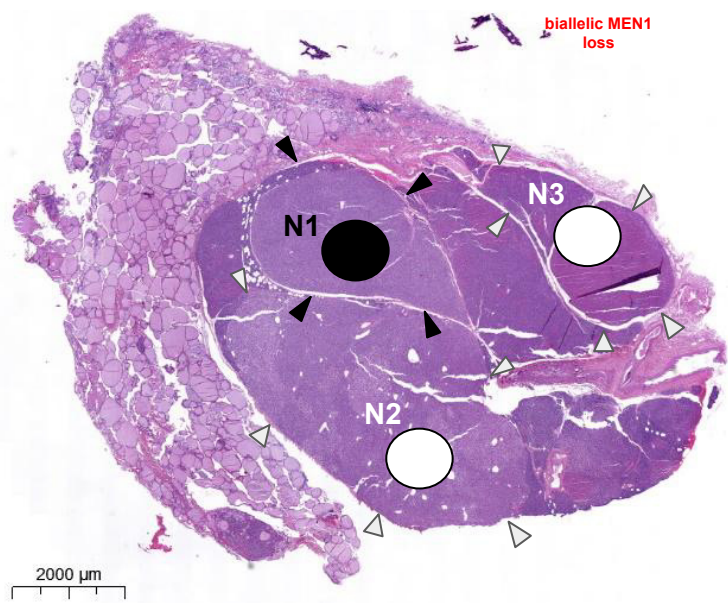

**B**

**N4**

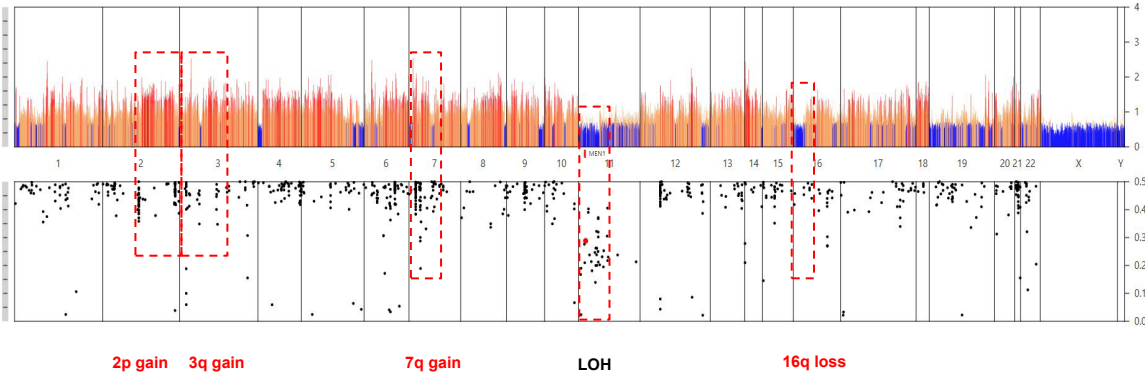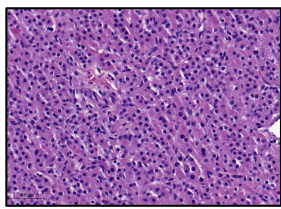

**N5**

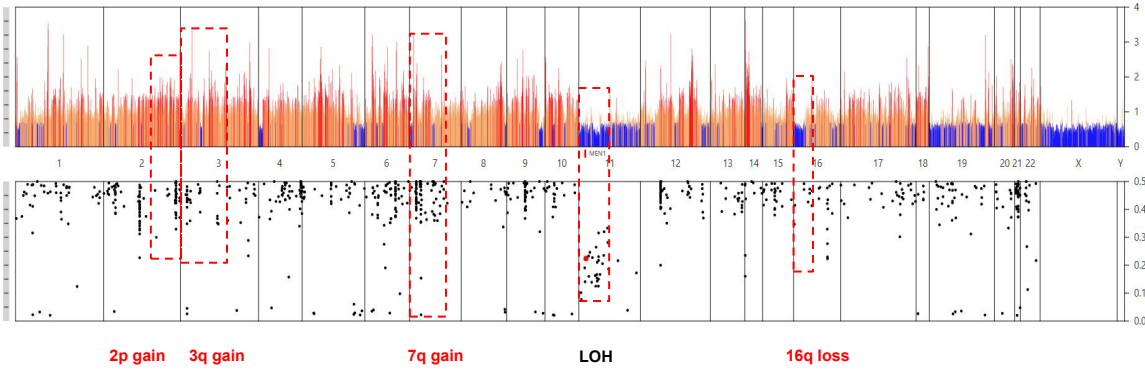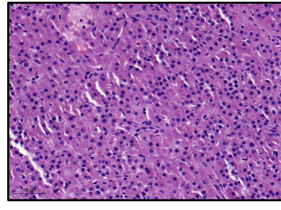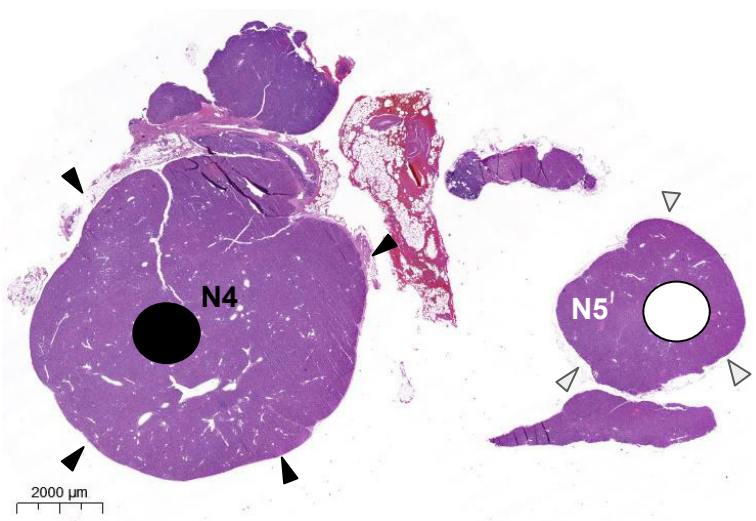

C

N6

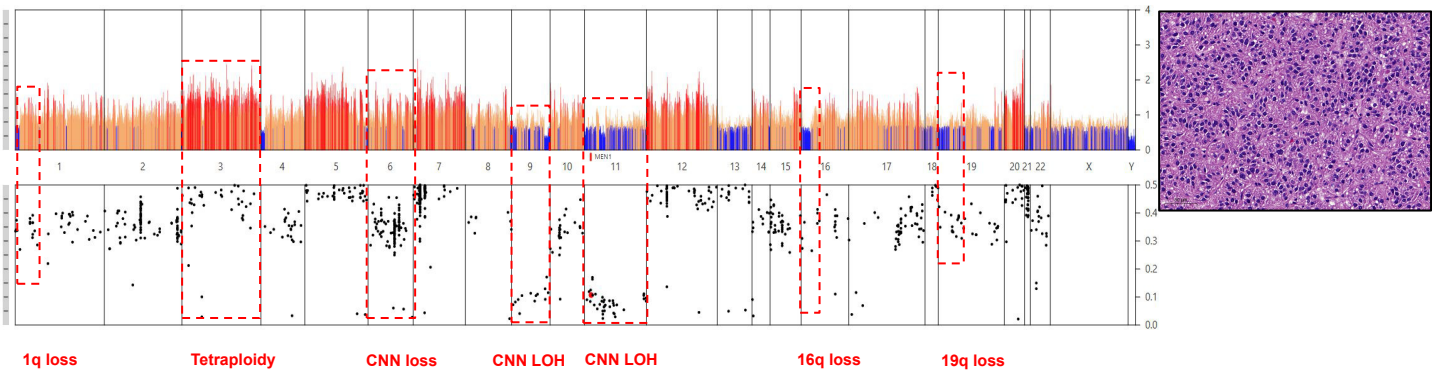

N7

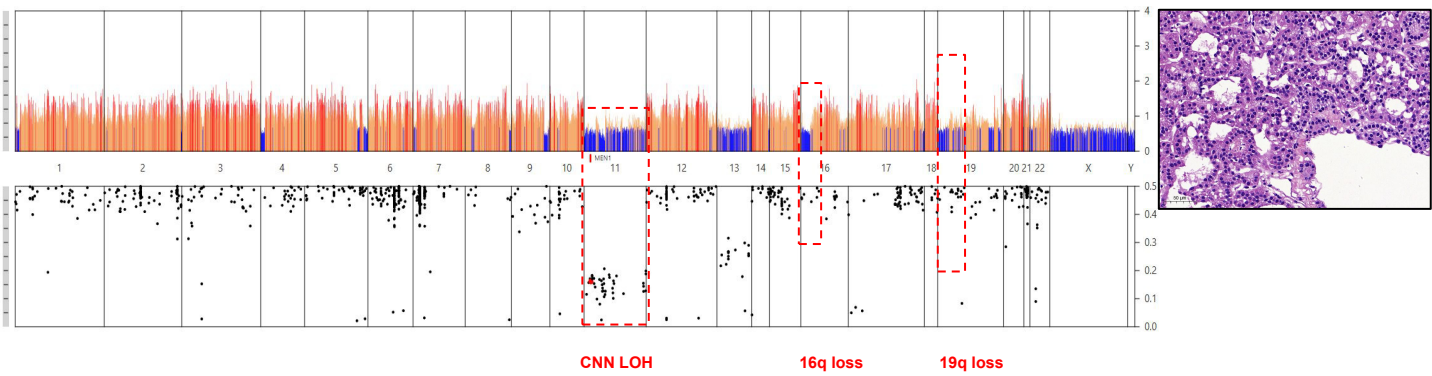

N8

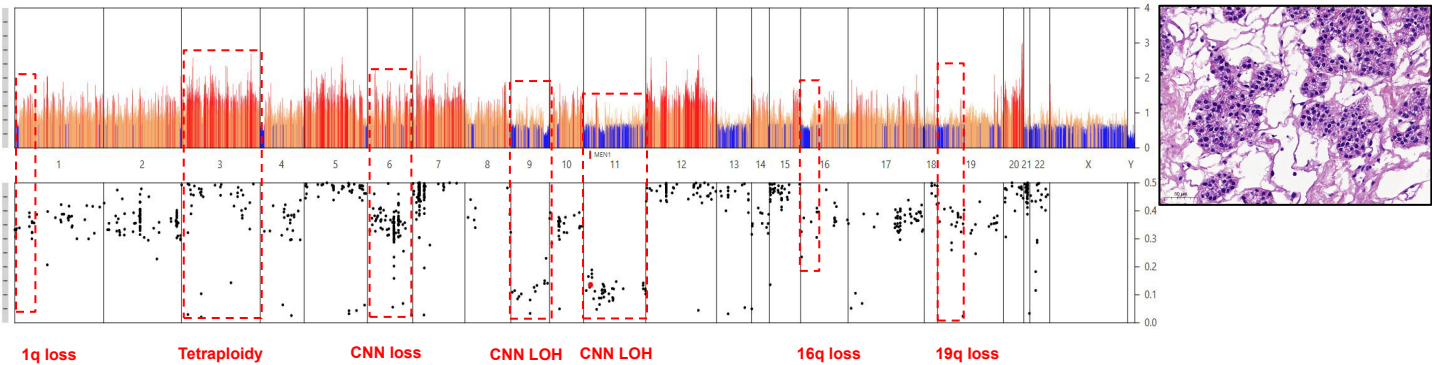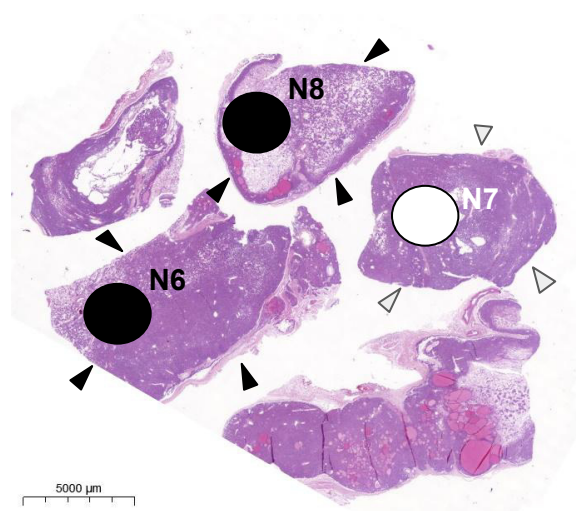

D

N9

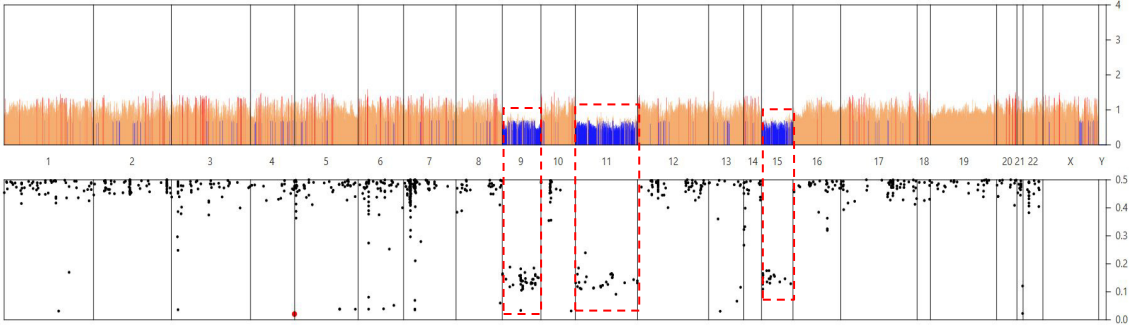

chromosomal loss      biallelic MEN1 loss      chromosomal loss

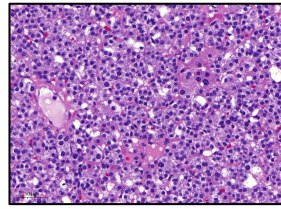

N10

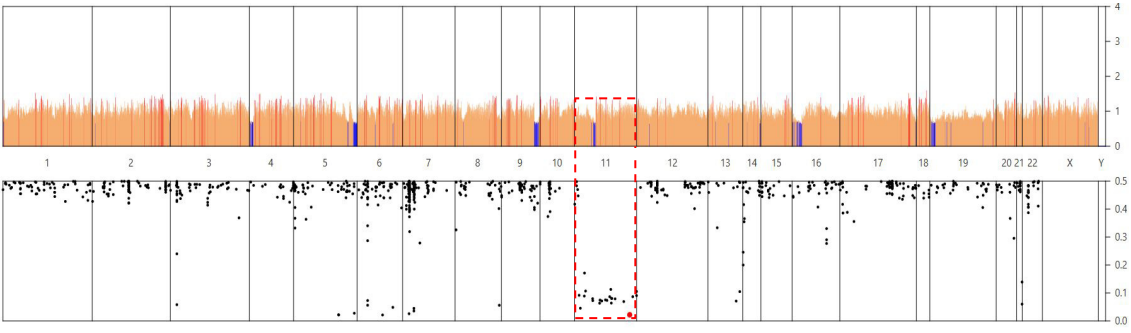

CNN LOH

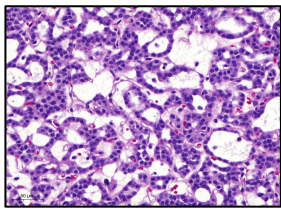

N11

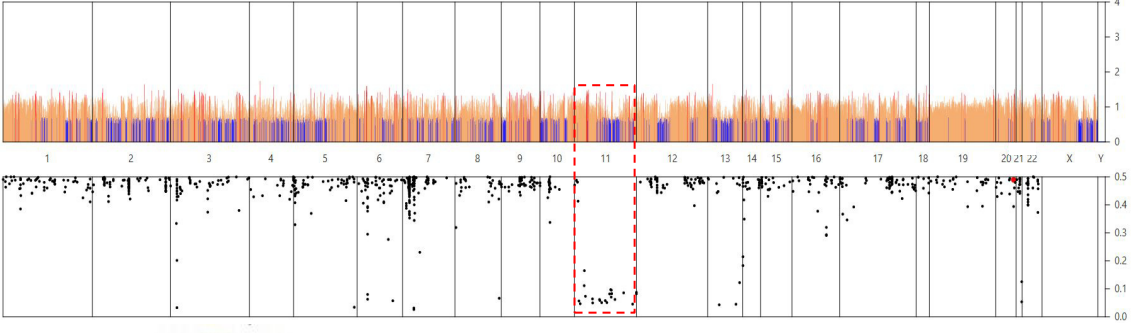

CNN LOH

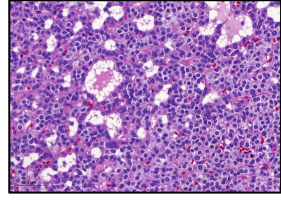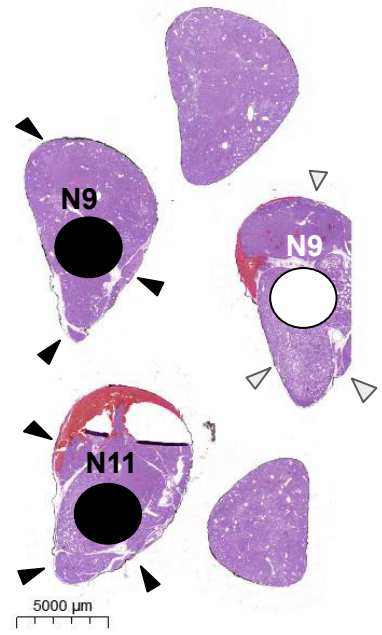

Supplement: 428_2023_3730_MOESM2_ESM.pdf [file 428_2023_3730_MOESM2_ESM.pdf]
