# Supplementary material for: Syndromic MEN1 parathyroid adenomas consist of both subclonal nodules and clonally independent tumors
Source: PubMed Central journal article supplement (PMC11106174; doi:10.1007/s00428-023-03730-3), 2024-01-20

**A**

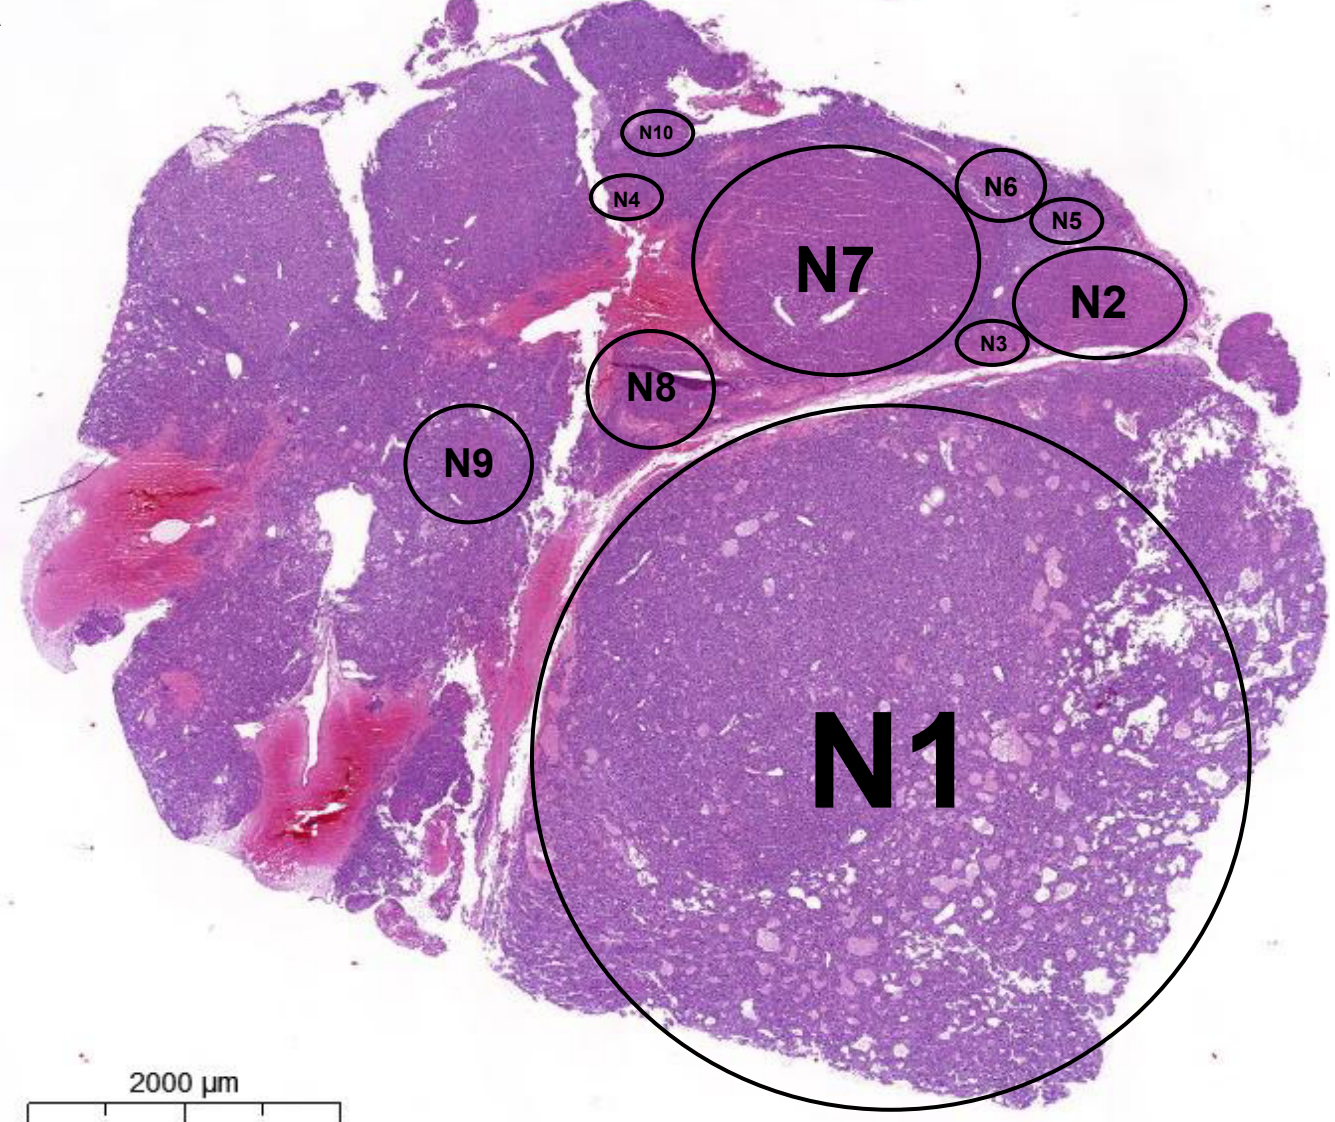

**B**

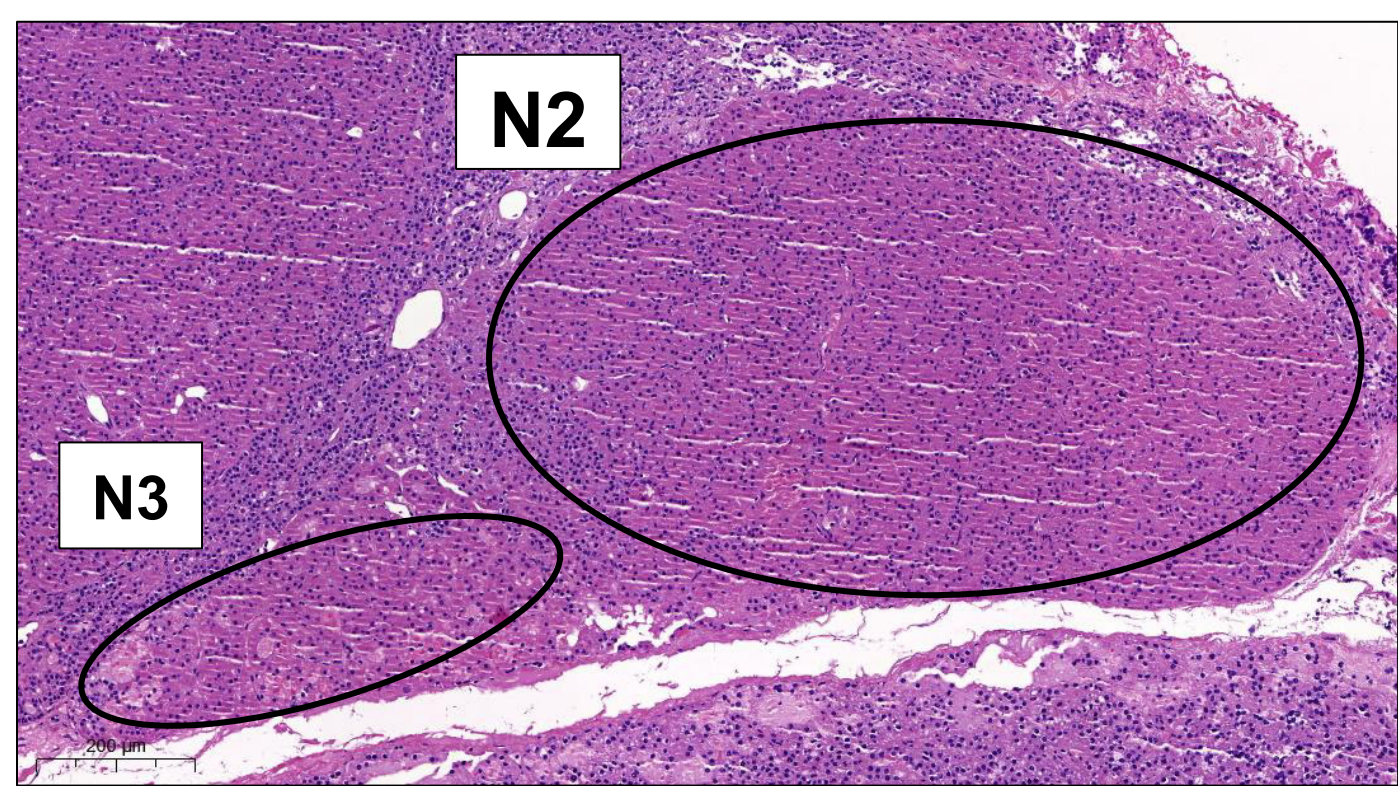

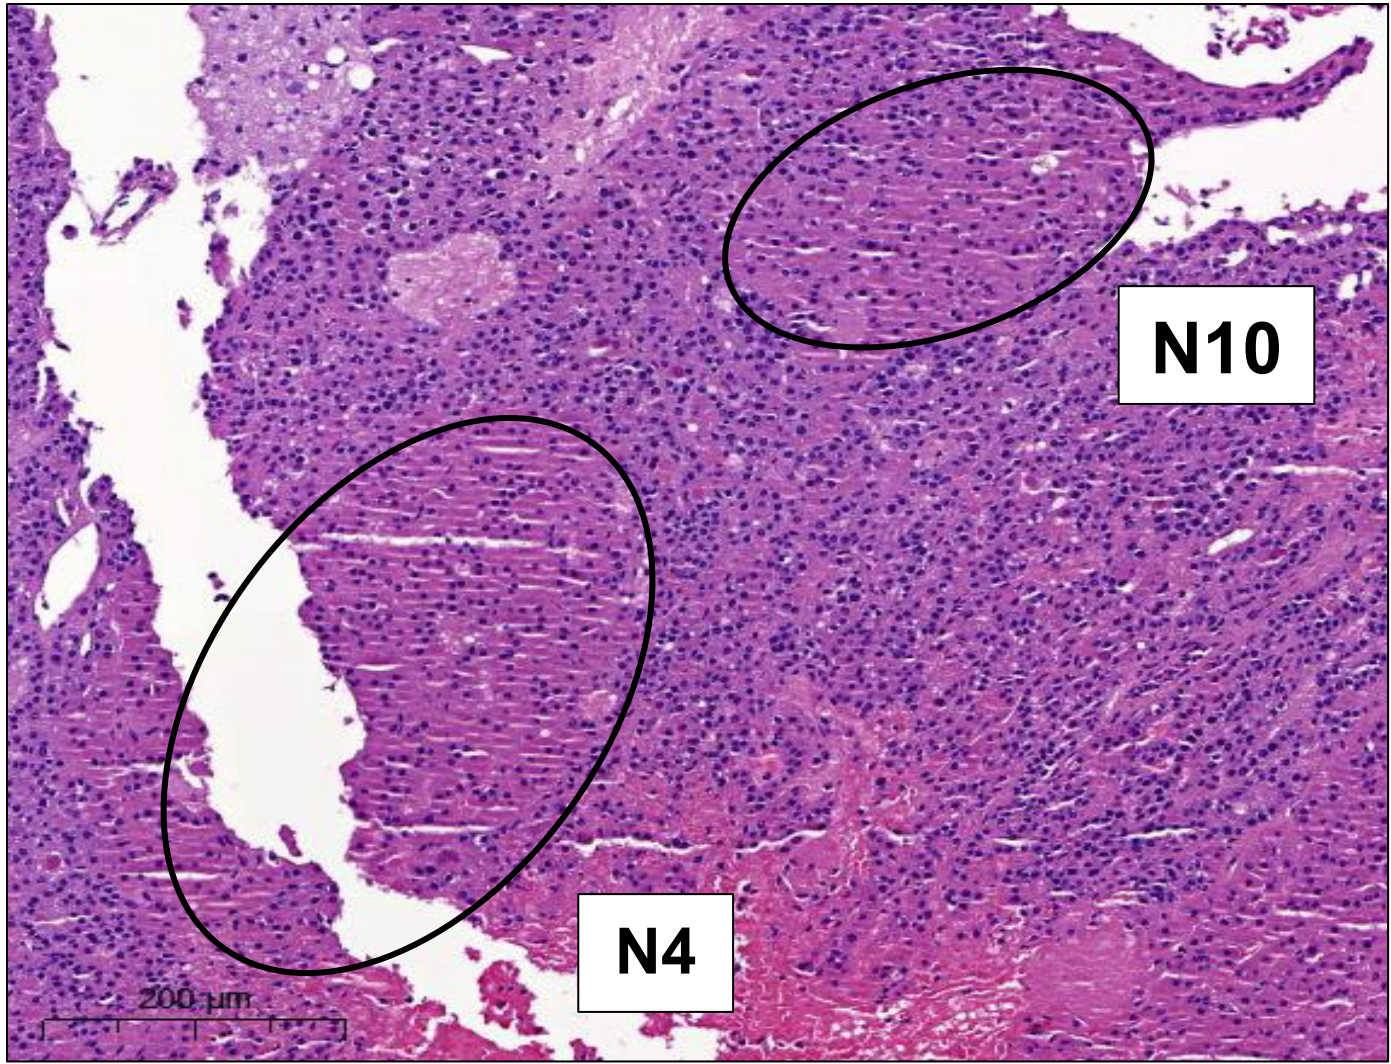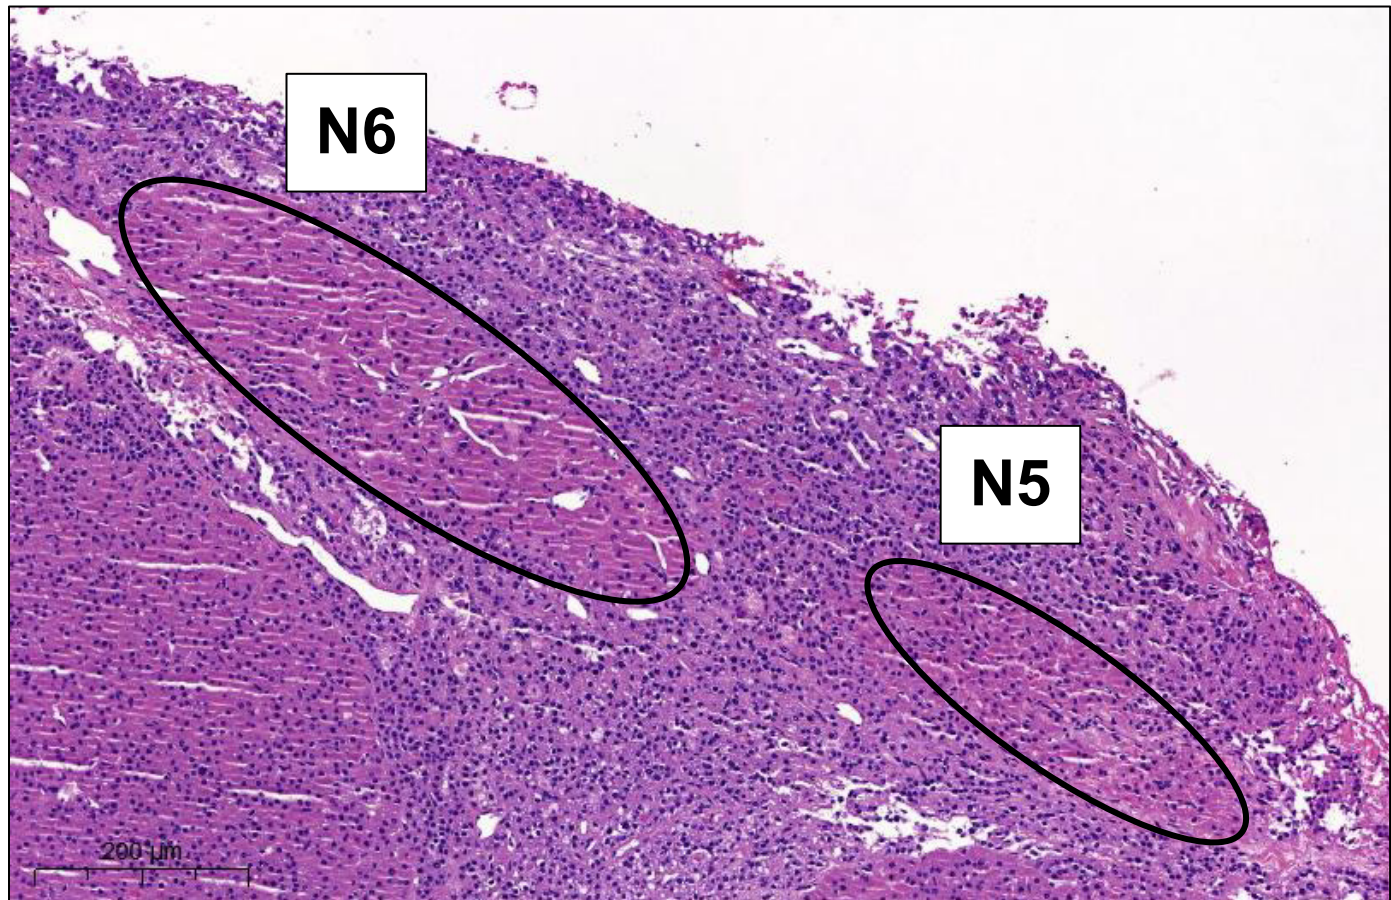

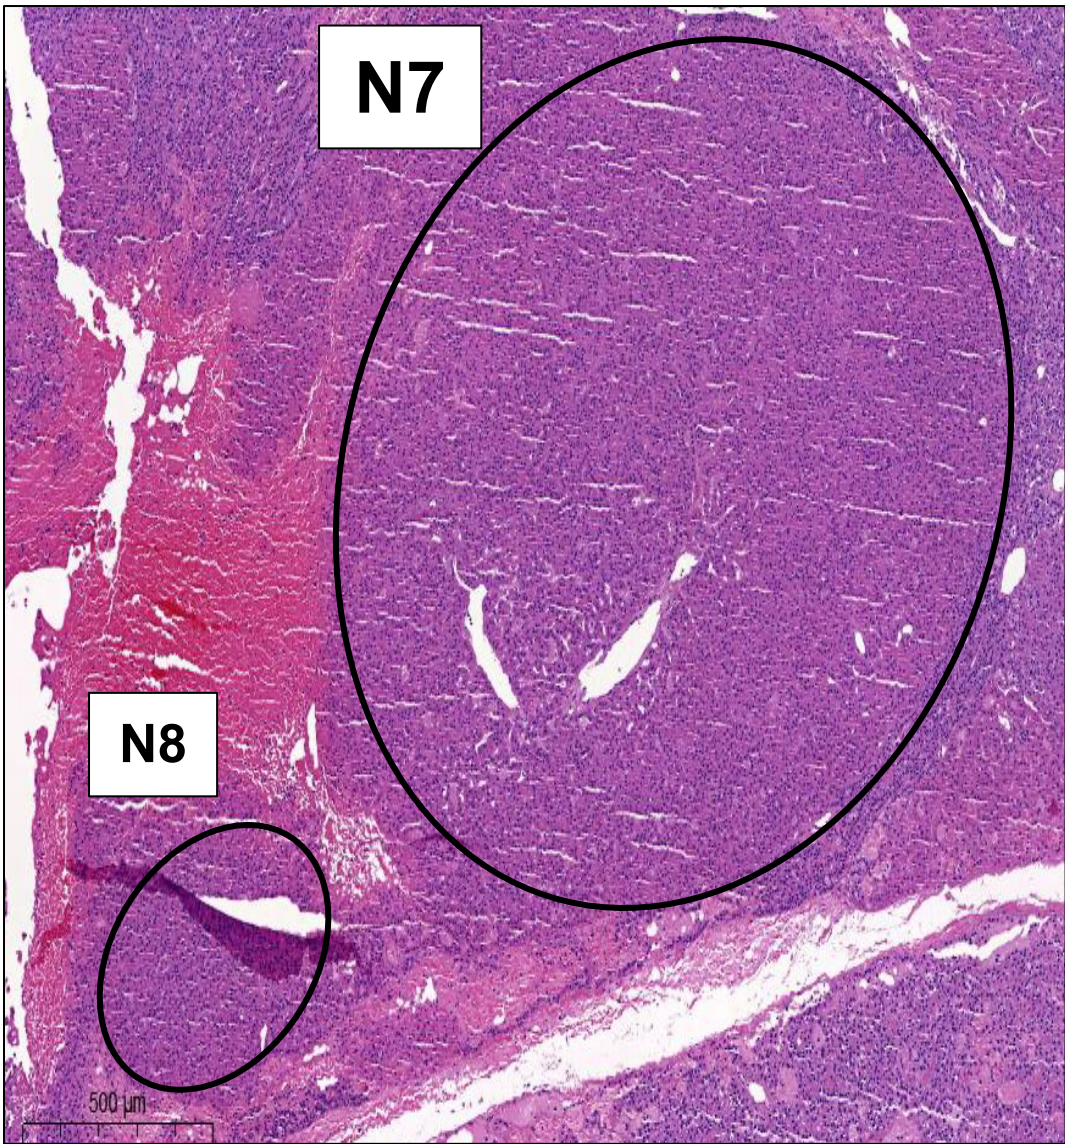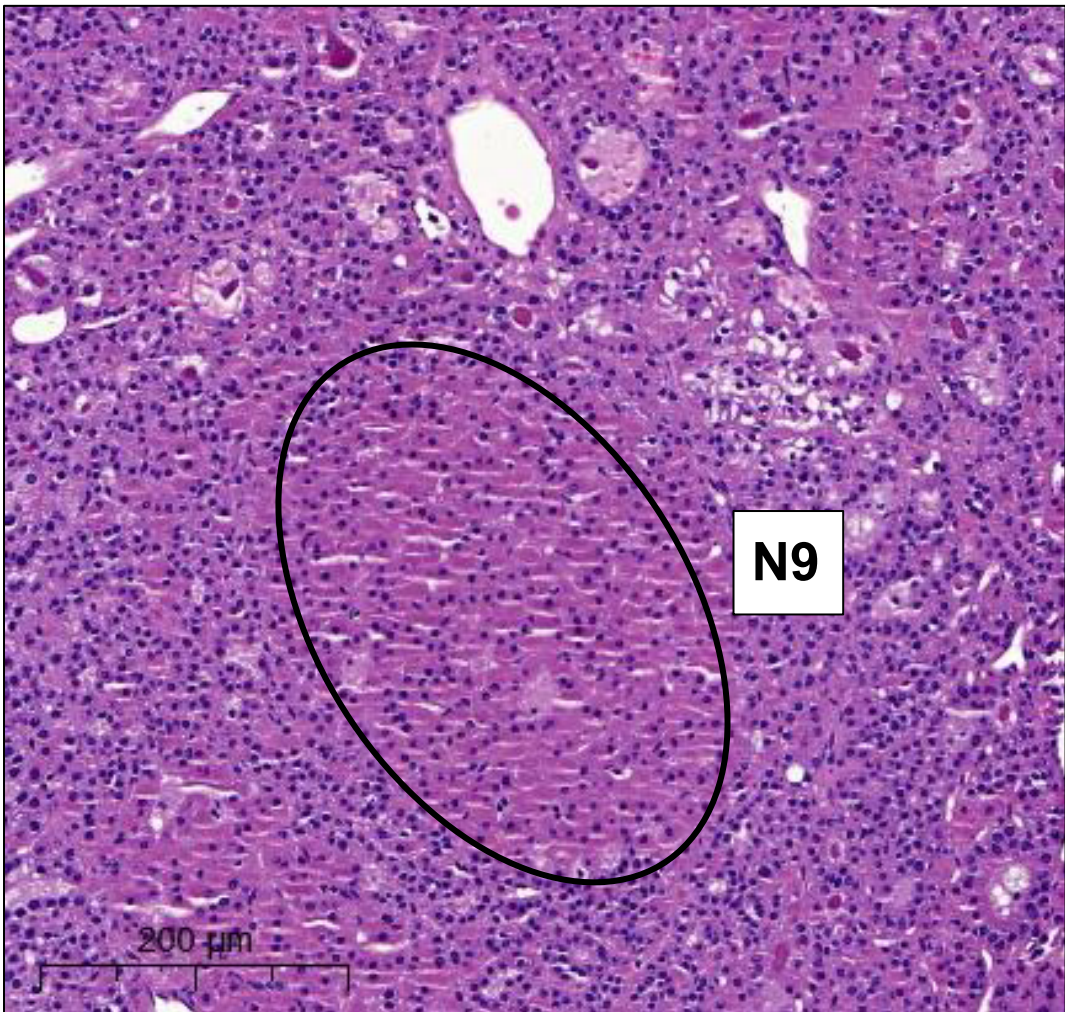

Supplement: 428_2023_3730_MOESM1_ESM.pdf [file 428_2023_3730_MOESM1_ESM.pdf]
