# Supplementary material for: Syndromic MEN1 parathyroid adenomas consist of both subclonal nodules and clonally independent tumors
Source: PubMed Central journal article supplement (PMC11106174; doi:10.1007/s00428-023-03730-3), 2024-01-20
Supplement: 428_2023_3730_MOESM3_ESM.pdf [file 428_2023_3730_MOESM3_ESM.pdf]

**A**

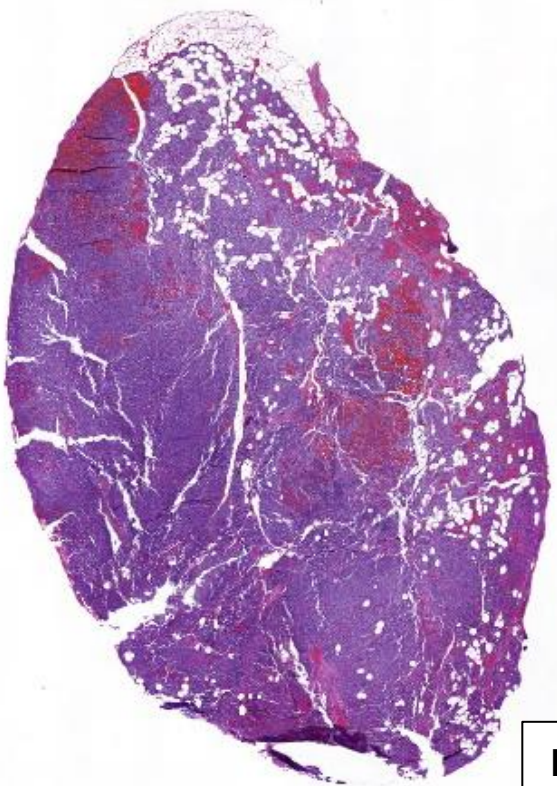

**H&E**

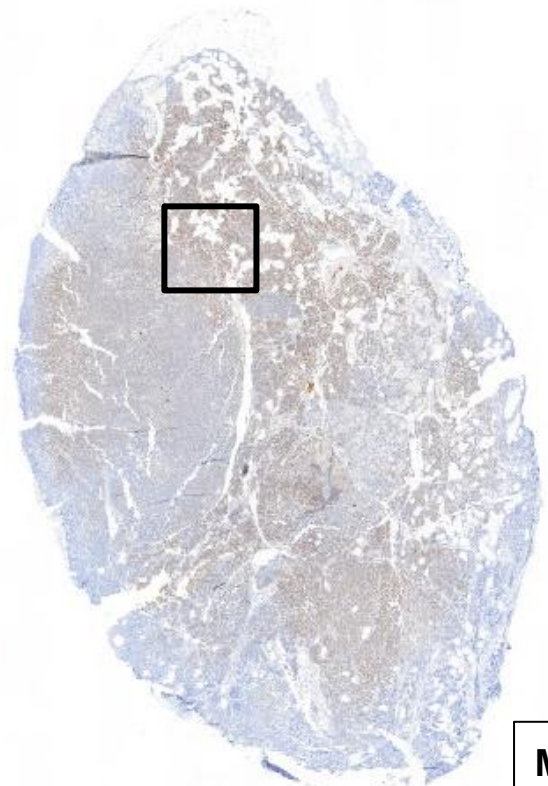

**Menin**

**B**

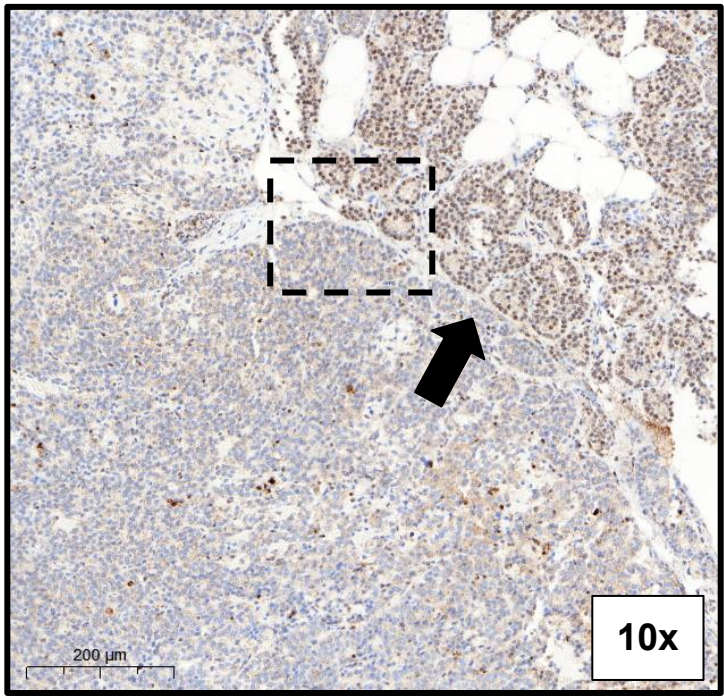

**10x**

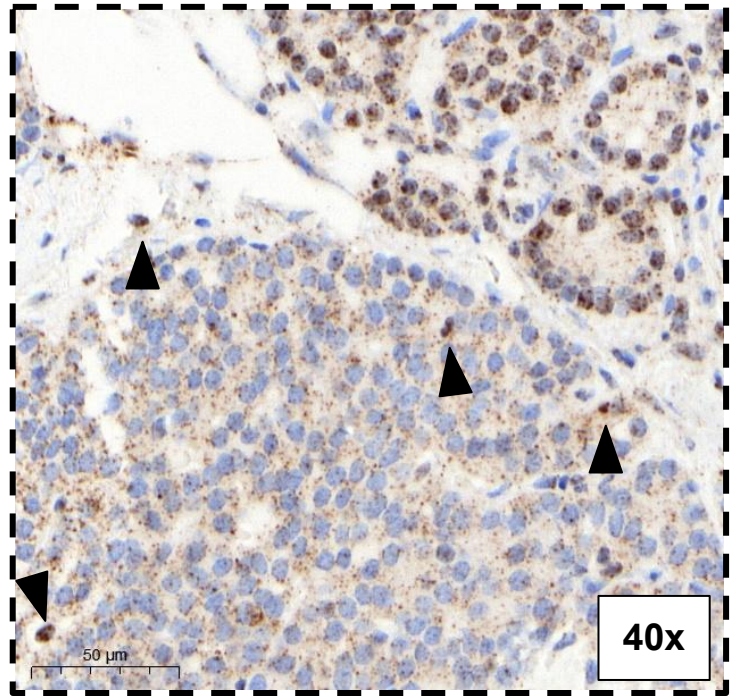

**40x**
